# Supplementary material
Source: PubMed Central journal article supplement (PMC7367475)
Supplement: NIHMS1590276-supplement-Supplemental_Figures___Table_S1___S4.pdf [file NIHMS1590276-supplement-Supplemental_Figures___Table_S1___S4.pdf]

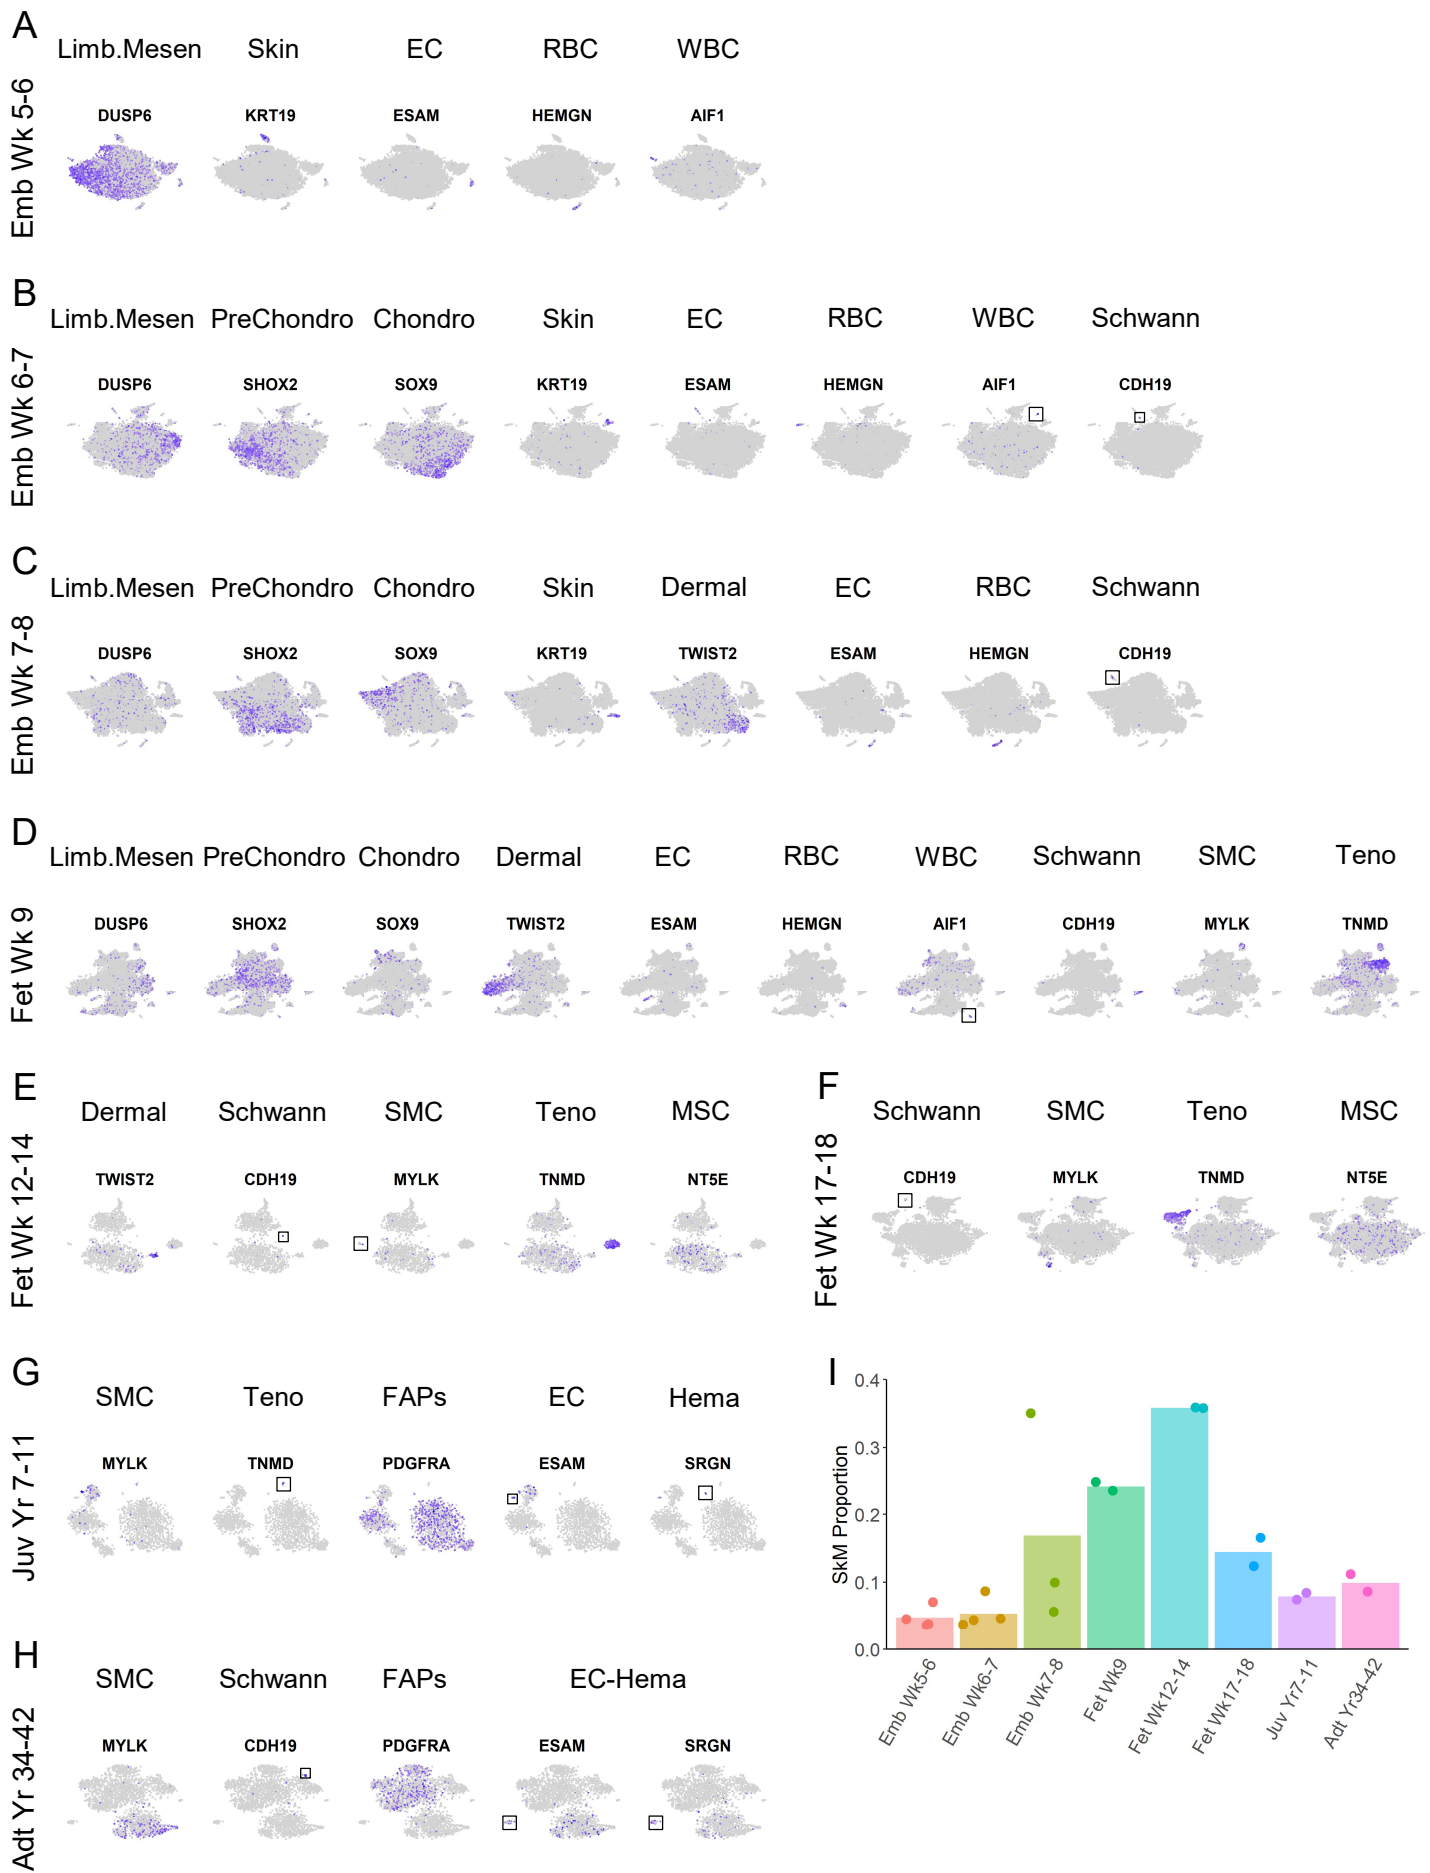

**Figure S1. Related to Figure 1. Cell types present in limbs and skeletal muscle tissues at different human developmental stages.**

**(A-H)** Single cells from all human biological replicates grouped by the indicated ages are plotted on tSNE space. Normalized expression levels of cell type marker genes are color-scaled (purple: high expression and gray: low expression). Small cell populations at certain developmental stages are boxed for easy visualization. **(I)** Proportions of SkM cells of each human biological replicates grouped by the indicated ages. Bars represent average SkM proportion of biological replicates within each age group and dots represent each sample.

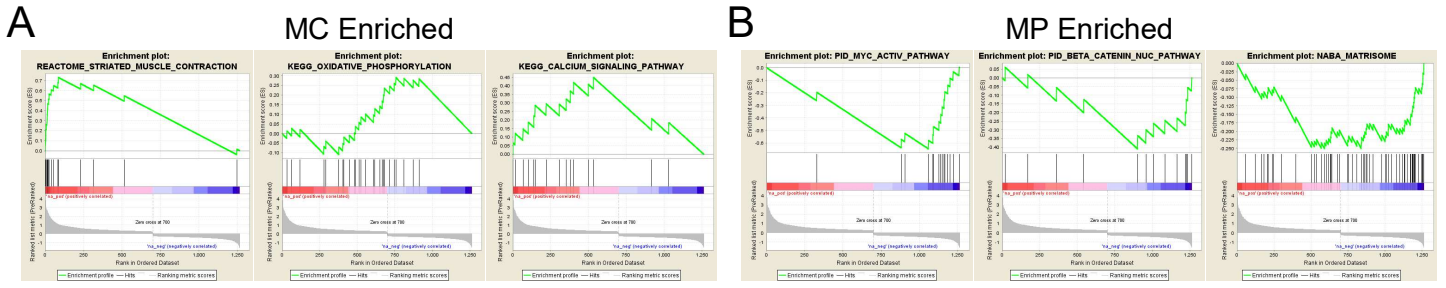

**C** **SkM.Mesen Enriched**

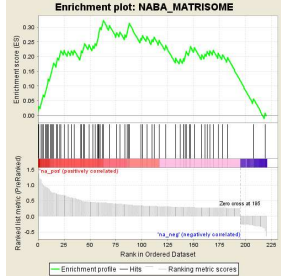

**D**

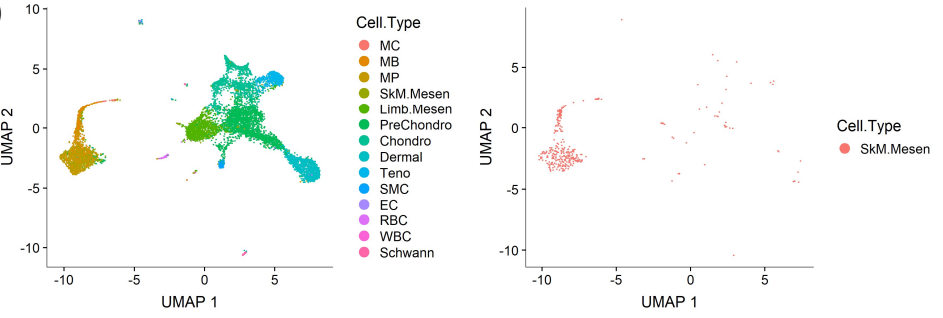

**E**

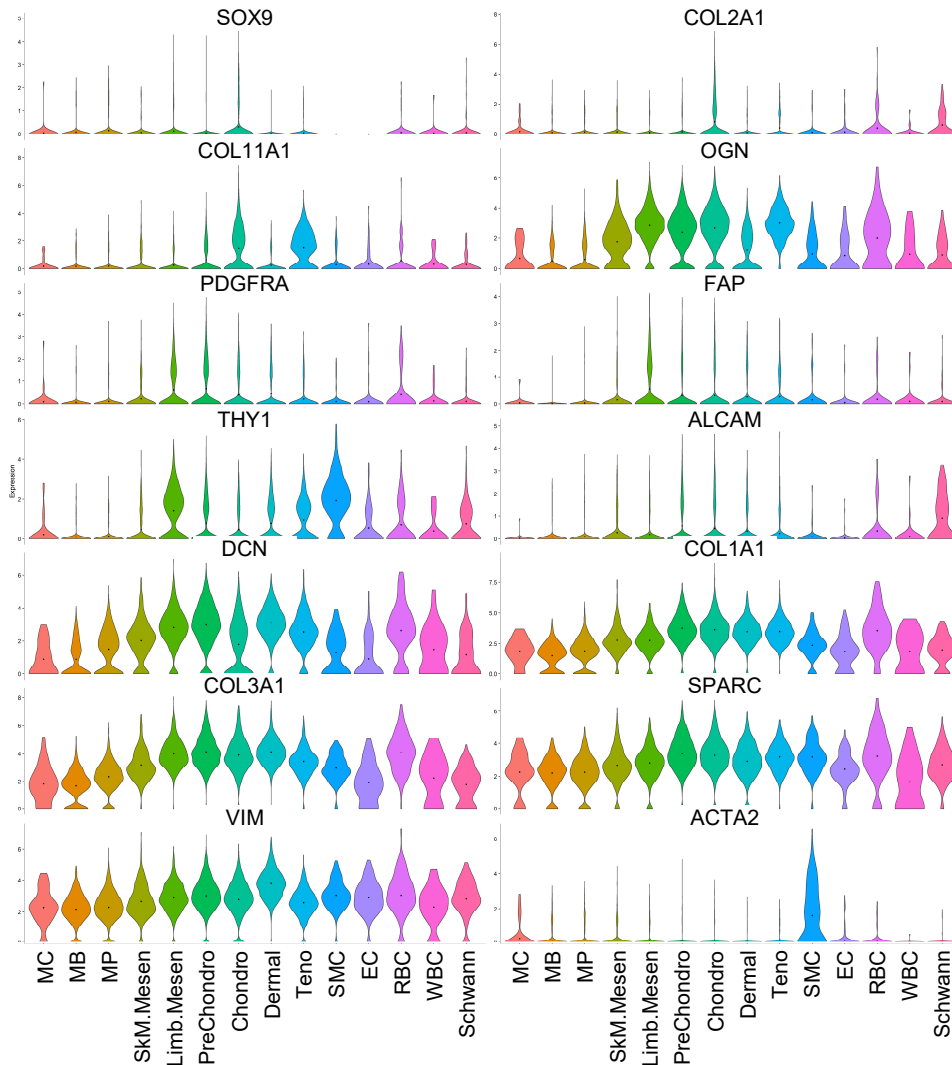

**Figure S2. Related to Figures 2 and 3. Characterization of skeletal myogenic subpopulations in human fetal limbs.**

**(A and B)** Selected enriched GSEA pathways from genes upregulated in MC vs. MP **(A)** or MP vs. MC **(B)** from fetal week 9 human SkM cells. Spikes in the red left side regions represent genes enriched in MC and those in the blue right side regions enriched in MP. **(C)** Selected enriched GSEA pathway from genes upregulated in SkM.Mesen vs. the main SkM subpopulations (MP, MB and MC) from fetal week 9 human SkM cells. Spikes in the red left side region represent genes enriched in SkM.Mesen and those in the blue right side region enriched in the main SkM subpopulations. **(D)** Left panel: single cells from all biological replicates from fetal week 9 human SkM cells are plotted on UMAP space in Monocle3 and colored by their cell types and myogenic subtypes assigned by Seurat. Right panel: only cells from the SkM.Mesen population are plotted to show their overlap with the main SkM populations. **(E)** Violin plots generated by Monocle3 showing normalized expression counts of chondrogenic and mesenchymal/fibroblastic markers across cell types and myogenic subtypes. Dots of each violin represent mean expression levels and width is proportional to the number of cells expressing the markers at a certain level.

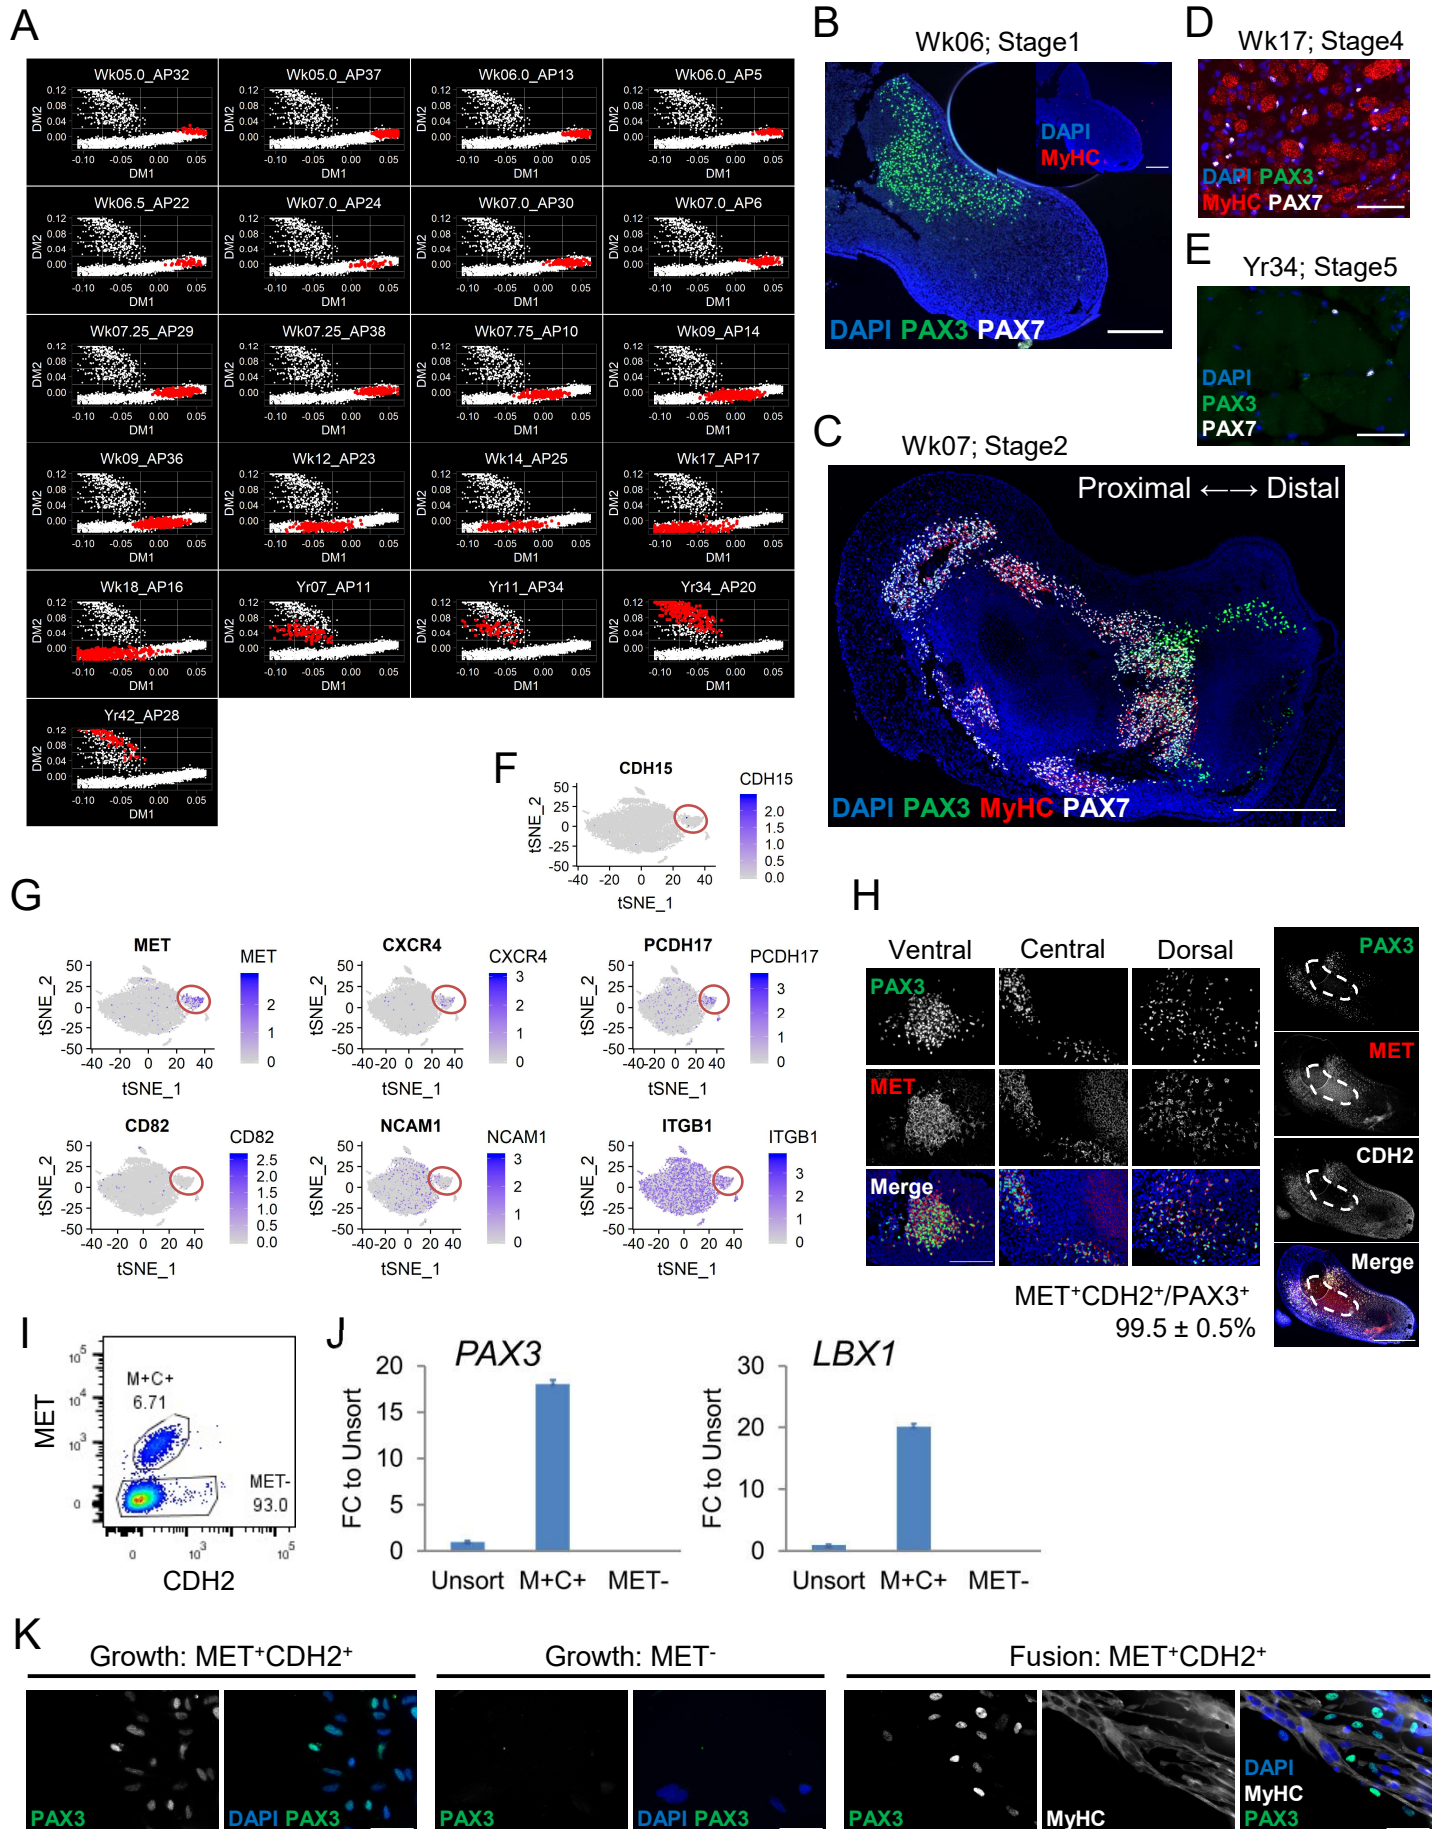

**Figure S3. Related to Figure 4. Distinct SMPC and SC populations across human development and isolation of myogenic cells from early human embryonic limbs.**

**(A)** DM plots highlighting cells from each *in vivo* human samples. Highlighted cells from a specific sample are encoded with red, while all the other cells colored white. **(B-E)** Representative IHC images of PAX3, PAX7 and MyHC on human tissue sections from embryonic week 6 hindlimb **(B)**, embryonic week 7 forelimb **(C)**, fetal week 17 quadriceps **(D)** and adult year 34 quadriceps **(E)**. Nuclei in all images were counterstained with DAPI. In **(B)**, images were taken in a mosaic mode and stitched together for the whole hindlimb and inset shows a stitched MyHC mosaic image taken from a neighboring section. Scale bars: 250  $\mu\text{m}$ . In **(C)**, images were taken in a mosaic mode and stitched together for the whole forelimb. Scale bar: 500  $\mu\text{m}$ . In **(D)**, scale bar: 50  $\mu\text{m}$ . In **(E)**, no specific PAX3 signals were detected and the green color represent autofluorescence emitted from myofibers. Scale bar: 50  $\mu\text{m}$ . **(F-G)** tSNE plots showing normalized expression levels of CDH15 **(F)** or additional cell surface molecules **(G)** in cells from embryonic week 5-6 hindlimbs. The SkM population was red-circled. **(H-K)** Identification of cell surface markers to isolate myogenic cells from human week 5-6 limbs. **(H)** Representative IHC images of co-expression of PAX3 and MET from hindlimbs of a human week 6 embryo. Nuclei were counterstained with DAPI. Left panel: Representative images taken at different section levels. Scale bar: 150  $\mu\text{m}$ . Right panel: representative images of the whole hindlimb at the central section level (images were taken in a mosaic mode and stitched together). Area enclosed by white dotted circle contains cells expressing low levels of MET, but not PAX3 or CDH2. Scale bar: 500  $\mu\text{m}$ . **(I)** Representative FACS plot of sorting MET<sup>+</sup>CDH2<sup>+</sup> (M<sup>+</sup>C<sup>+</sup>) and MET<sup>-</sup> populations from hindlimbs of a week 5 human embryo. Numbers indicate the percentage of each population. **(J)** qRT-PCR of PAX3 and LBX1 of the sorted populations. Expression values are normalized to GAPDH and fold change of unsorted cells is set to 1. Data represent mean+SD of technical triplicates of 1 out of 2 representative embryos. **(K)** Images of IF staining of sorted cells cultured under growth conditions for PAX3 and fusion conditions for PAX3 and MyHC. Since MET<sup>-</sup> cells were not supported by the skeletal muscle growth medium, they were not further subjected to the fusion medium. Nuclei were counterstained by DAPI. Scale bars: 50  $\mu\text{m}$ .

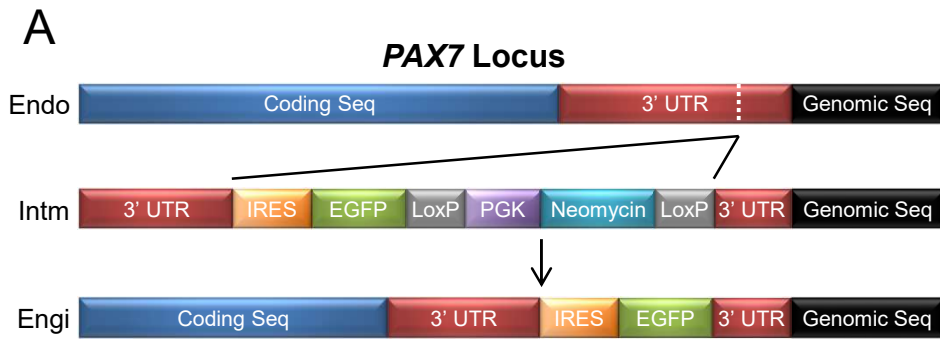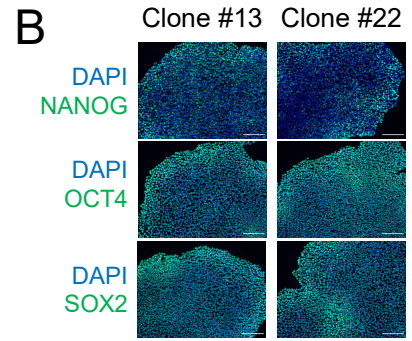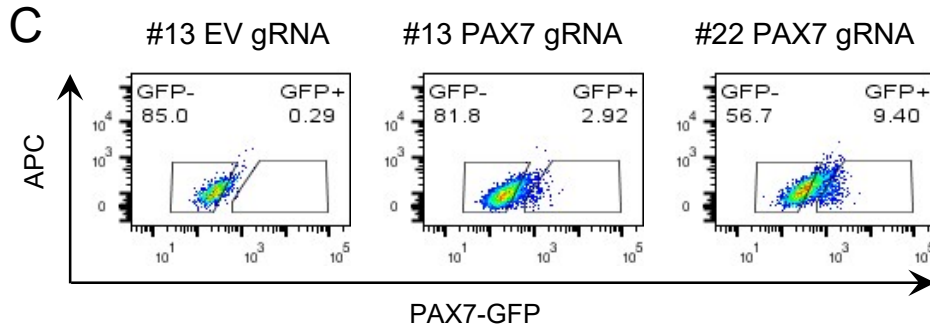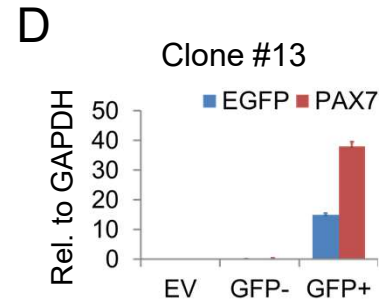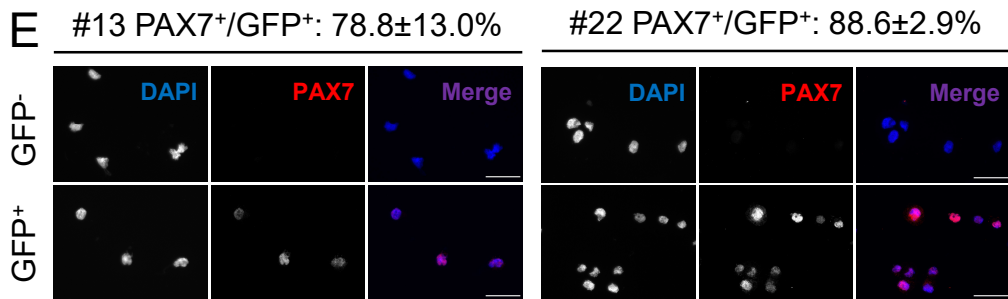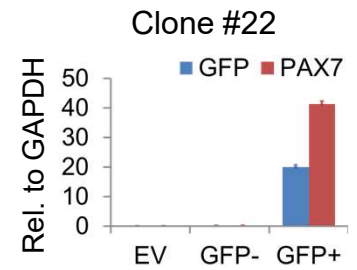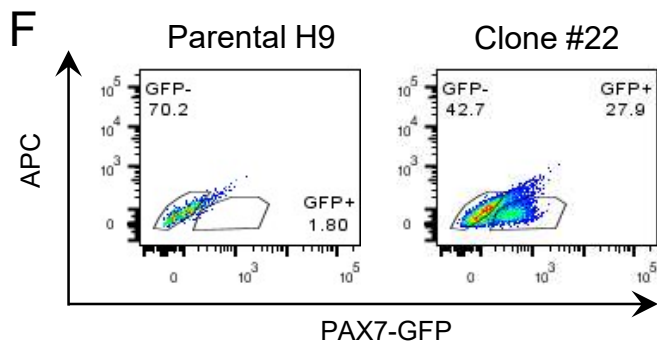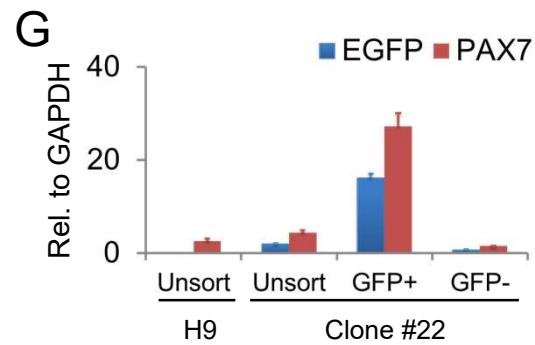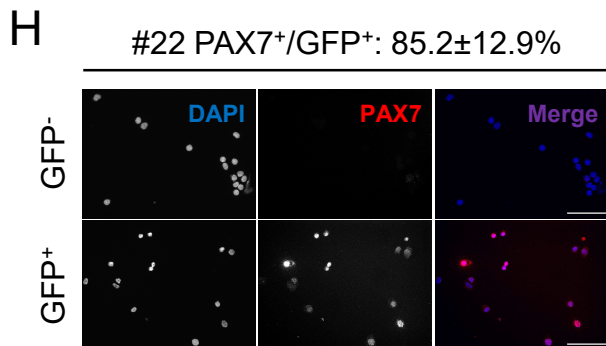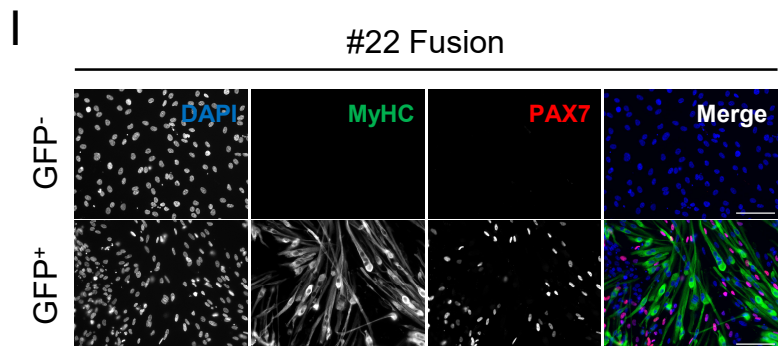

**Figure S4. Related to Figures 5 and 6. Construction of the PAX7-GFP reporter cell lines.**

**(A)** Schematic of reporter targeting strategy. The white dotted line in the top track indicates Cas9 cutting site. Endo, endogenous; Intm, intermediate; Engi, engineered. **(B)** Pluripotency marker IF staining of generated reporter cell clones #13 and #22. Nuclei were counterstained by DAPI. Scale bars: 150  $\mu\text{m}$ . **(C-E)** Verification of reporter cells using dCas9-VPR system. **(C)** Reporter cells from clone #13 and #22 transfected by plasmids encoding dCas9-VPR along with those encoding *PAX7* promoter region targeting gRNAs or empty vectors (EV), were sorted into GFP<sup>+</sup> and GFP<sup>-</sup> fractions. **(D)** qRT-PCR of *GFP* and *PAX7* expression on sorted cells. Data are normalized to GAPDH and represent mean+SD of technical triplicates of a representative experiment. **(E)** Representative images of sorted cells subjected to cytospin followed by IF of PAX7. Numbers represent average percentage of GFP<sup>+</sup>-sorted cells expressing PAX7 with SEM, from 2 independent experiments. Nuclei were counterstained by DAPI. Scale bars: 50  $\mu\text{m}$ . **(F-I)** Verification of reporter cells using directed differentiation (HX protocol). **(F)** Representative FACS plots of clone #22 reporter cells differentiated using HX protocol to sort for GFP<sup>+</sup> and GFP<sup>-</sup> fractions. H9 parental cells from the same differentiation batch were used as GFP gating controls. **(G)** qRT-PCR of *GFP* and *PAX7* expression on sorted #22 cells as well as unsorted #22 or parental H9 cells. Data are normalized to GAPDH and represent mean+SD of technical triplicates of 1 out of 2 representative experiments. **(H)** Representative images of sorted cells subjected to cytospin followed by IF of PAX7. Numbers represent average percentage of GFP<sup>+</sup>-sorted cells expressing PAX7 with SEM, from 2 independent experiments. Nuclei were counterstained by DAPI. Scale bars: 100  $\mu\text{m}$ . **(I)** Images of IF staining of sorted cells cultured under fusion conditions for PAX7 and MyHC. Nuclei were counterstained by DAPI. Scale bars: 100  $\mu\text{m}$ .



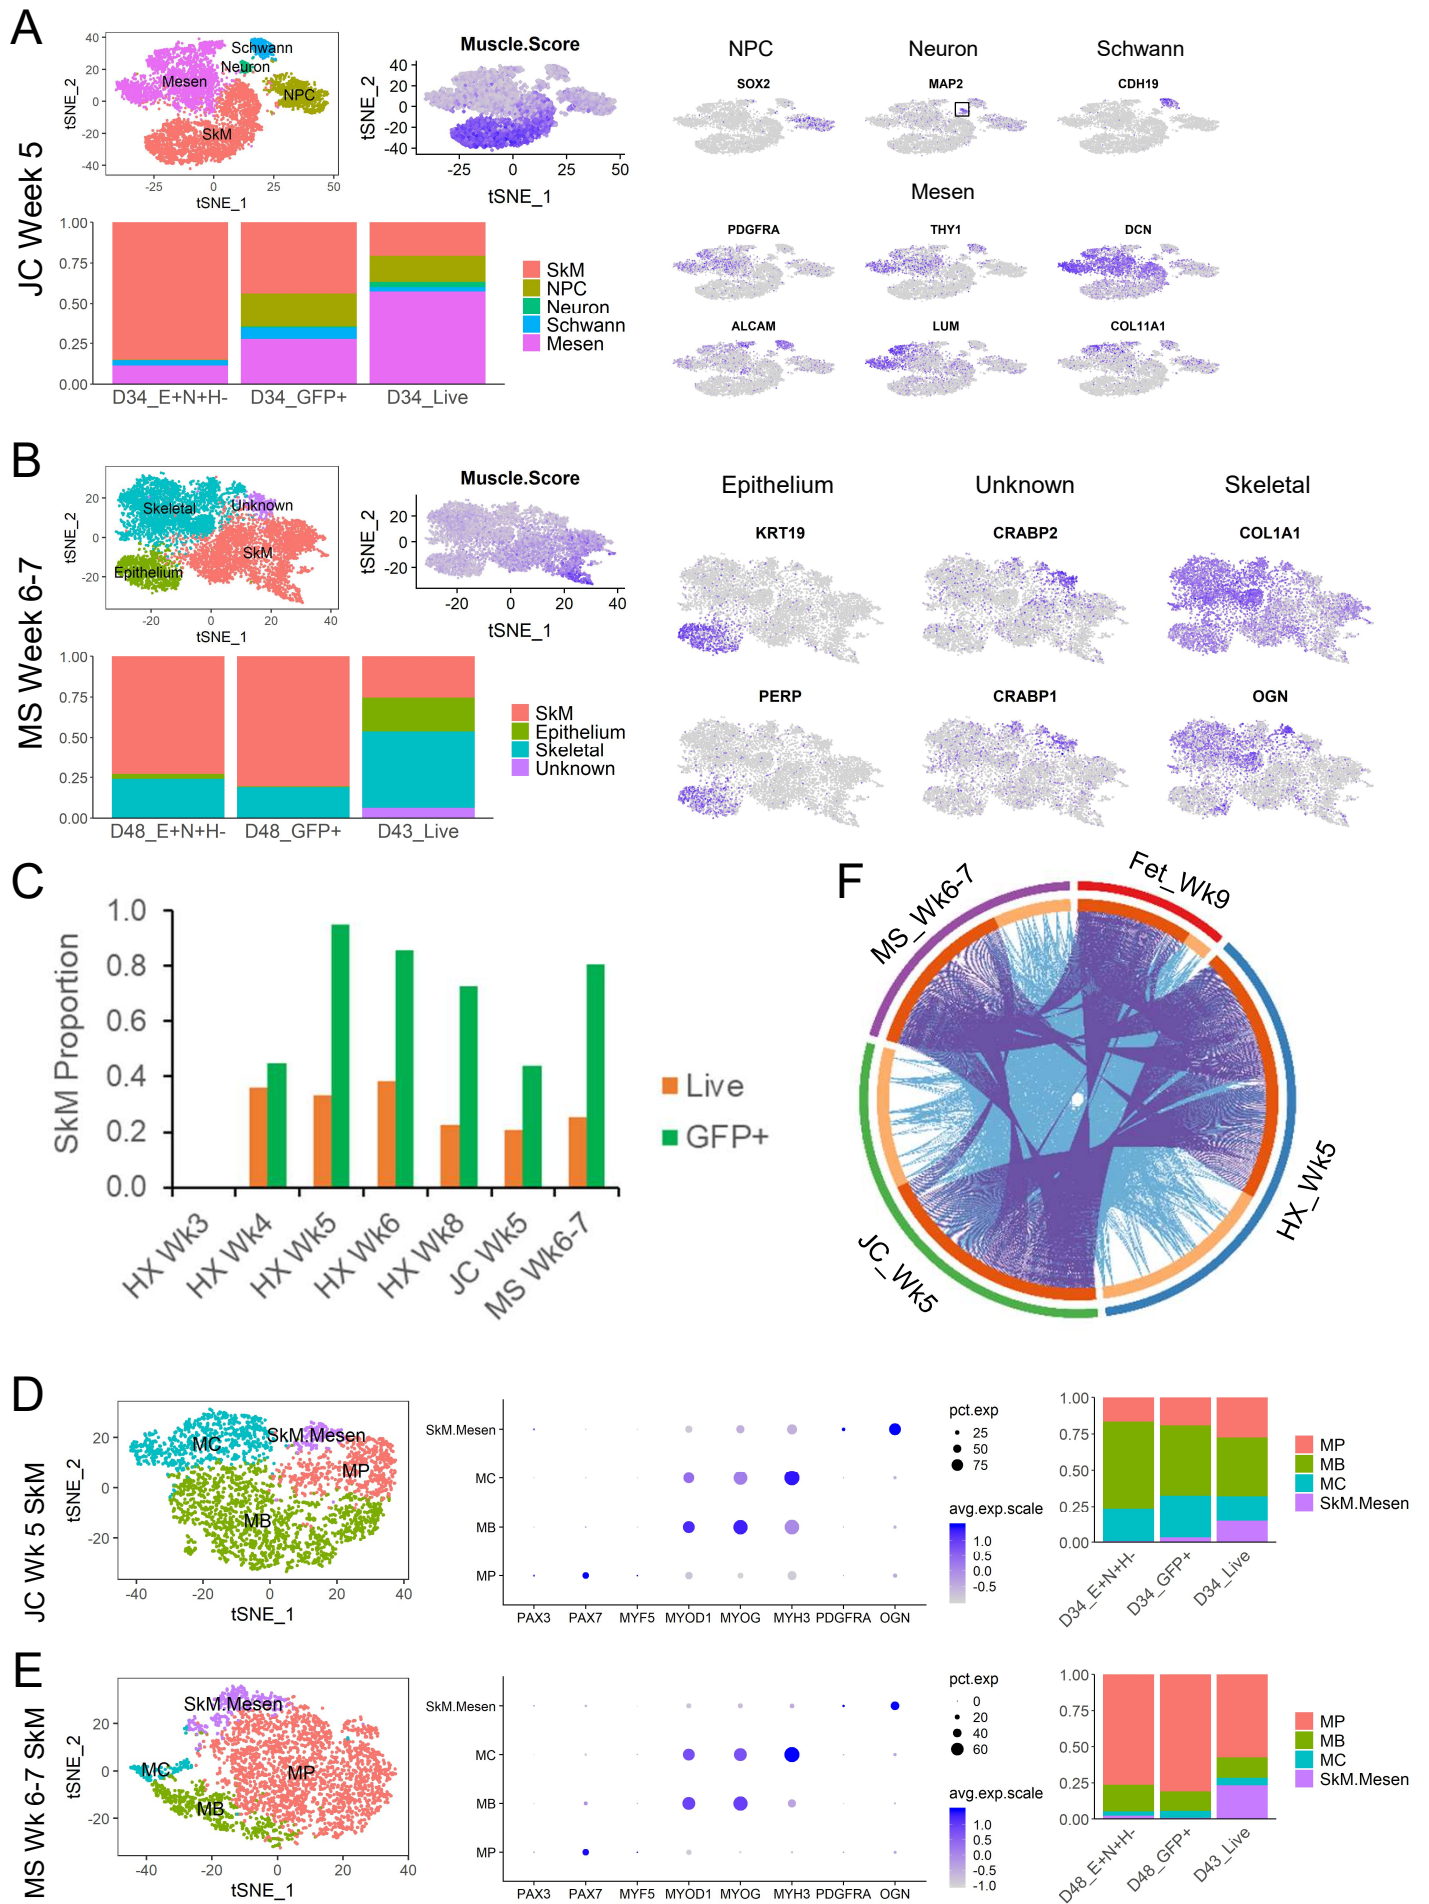

**Figure S5. Related to Figures 5 and 6. scRNA-seq reveals heterogeneous cell types and skeletal muscle subpopulations from additional hPSC myogenic differentiation protocols.**

**(A)** Single cells from all hPSC-derived samples (both unenriched and enriched) using JC protocol at week 5 of differentiation are plotted on tSNE space. They are color-coded by assigned cell types, or color-scaled based on normalized expression levels of “Muscle.Score” and other cell type gene markers (purple: high expression and gray: low expression). The small *MAP2*<sup>+</sup> neuron population is boxed for easy visualization. Bottom left bar plots showing the proportion of cell types distributed in each enriched or unenriched samples. **(B)** Similar to **(A)** with week 6-7 cells differentiated by MS protocol. **(C)** Quantification of SkM cell proportion in live- or GFP<sup>+</sup>-sorted samples examined by scRNA-seq from 3 protocols. **(D)** Left panel: single cells (classified as the “SkM” cell type from **(A)**) from enriched and unenriched samples at week 5 under JC protocol are plotted on tSNE space and colored by their assigned myogenic subtypes. Middle panel: dot plots of selected marker genes in each cell subtype. Normalized gene expression counts are averaged across all cells in given cell clusters. Sizes of dots represent percentage of marker expressing cells within each population and colors show levels of markers in expressing cells scaled across populations. Right panel: bar plots showing the proportion of myogenic subtypes distributed in each enriched or unenriched samples. **(E)** Similar to **(D)** with week 6-7 cells differentiated by MS protocol. **(F)** Circos plot of shared and linked genes enriched in the SkM.Mesen subpopulations over the main SkM subpopulations from all three *in vitro* differentiation protocols and from *in vivo* fetal week 9 samples. Outer ring is color-coded by sample identities. Red regions of inner ring denote genes shared by at least two gene sets and orange regions contain genes that are unique. Purple lines connecting exactly same genes and light blue lines connecting different genes belonging to similar biological processes.

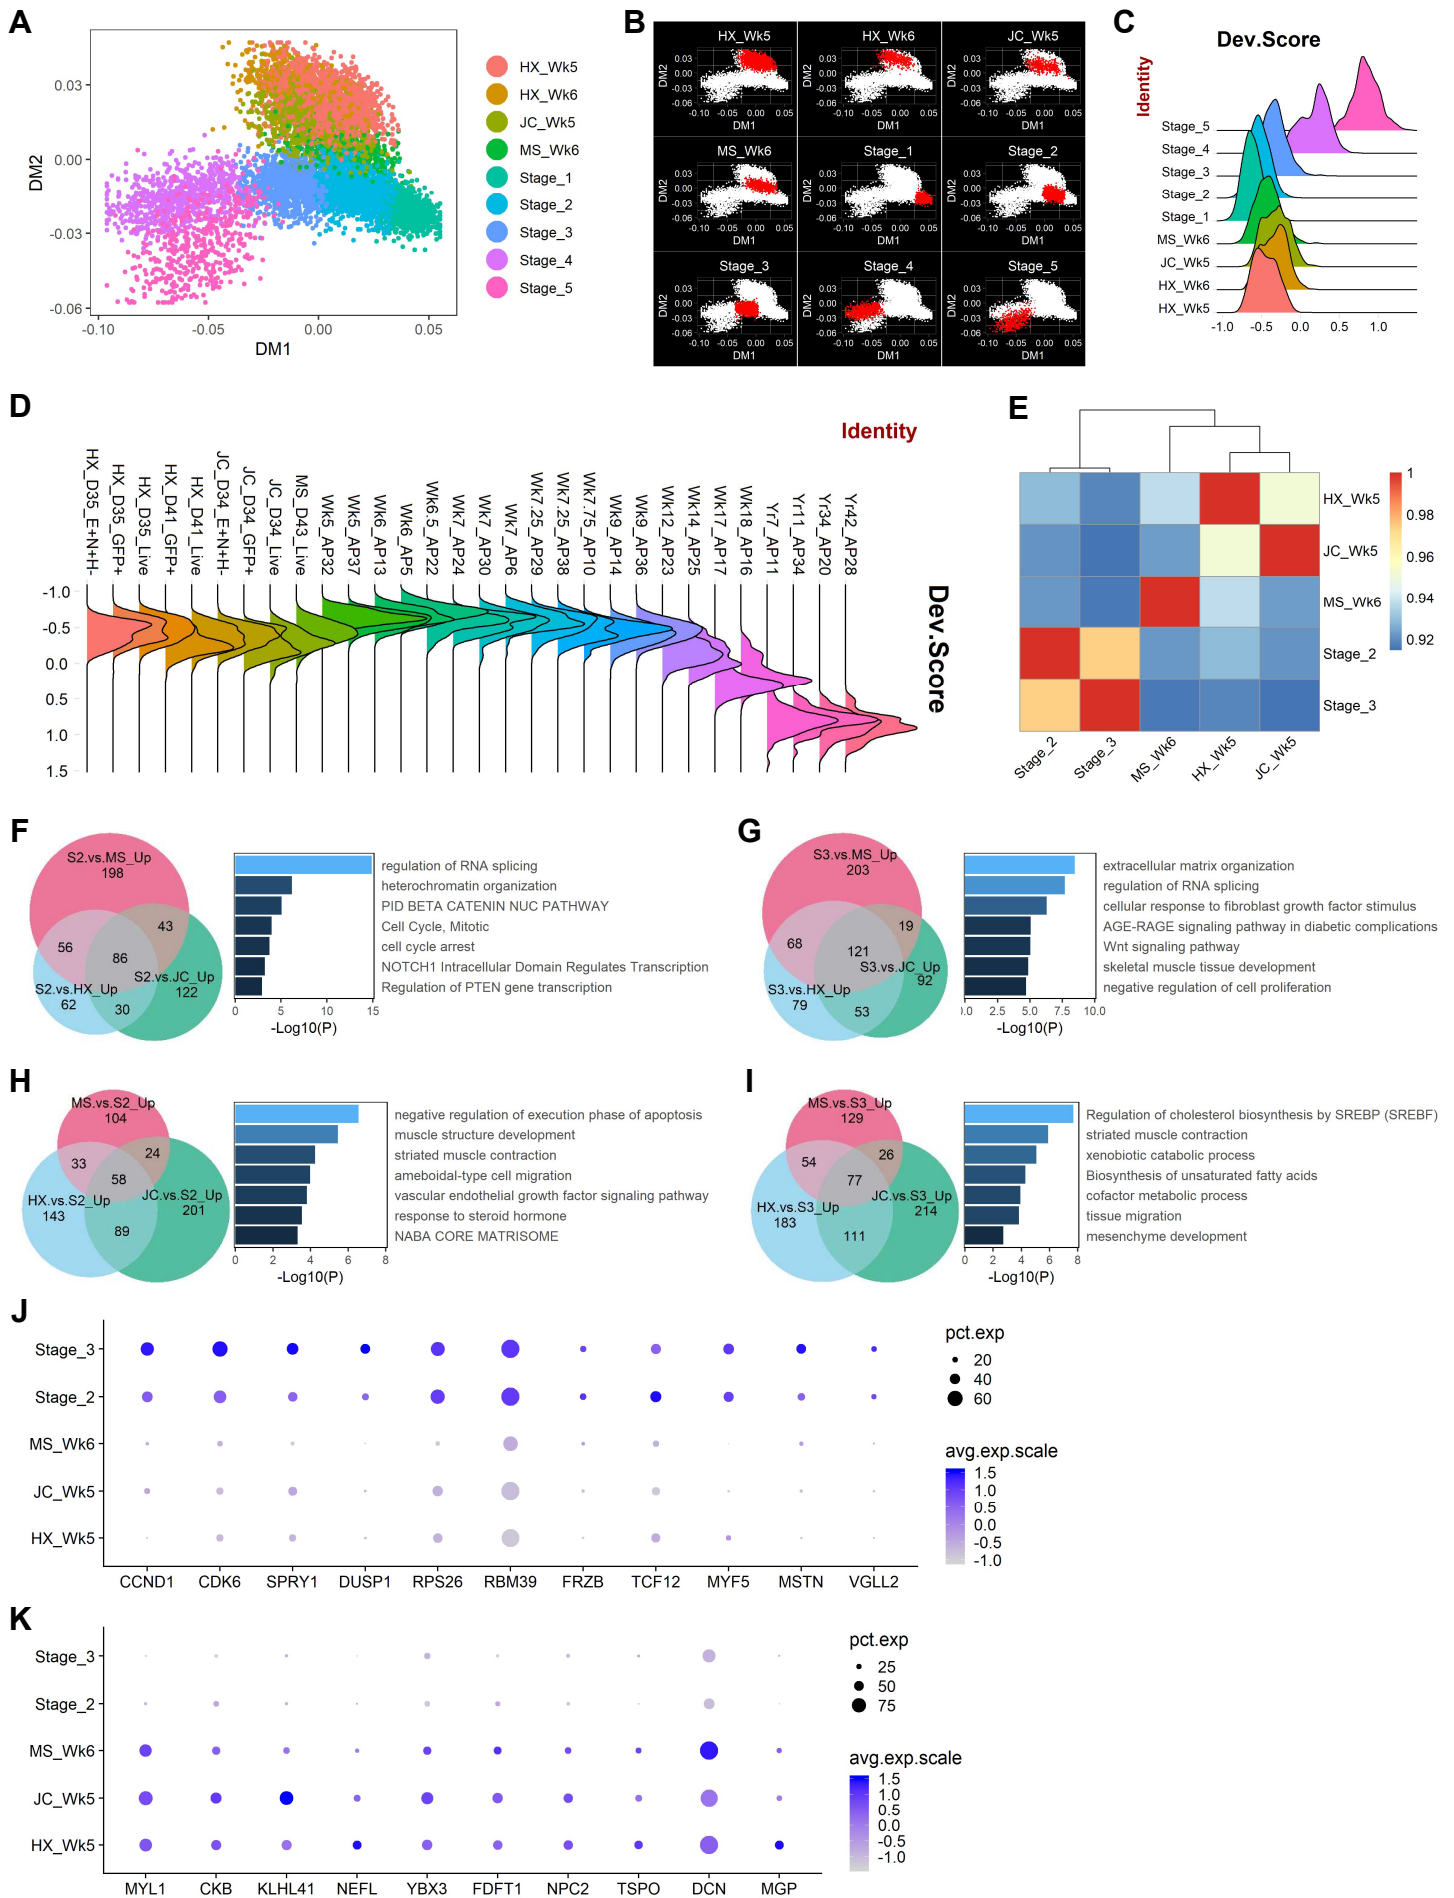

**Figure S6. Related to Figure 7. *In vitro* SMPCs derived from multiple hPSC myogenic differentiation protocols are different from *in vivo* human myogenic progenitor cells during embryonic-to-fetal transition.**

**(A-C)** Single cell trajectory **(A)** and individual stage highlighting **(B)** on DM space, and ridge plot “Dev.Score” distribution **(C)** as similar to Figures 6A-6C with SMPCs and SCs from *in vivo* human samples and *in vitro* derived from hPSCs using HX, JC and MS protocols at the indicated differentiation time points. **(D)** Ridge plot of “Dev.Score” distribution similar to **(C)** but grouped by individual samples. **(E)** Spearman correlation coefficients between each group of cells were calculated. Heatmap showing the groups’ correlations and hierarchical clustering. **(F-I)** Differential gene expression analyses were performed to identify genes commonly upregulated from *in vivo* stage 2/3 SMPCs compared to *in vitro* hPSC-SMPCs derived from three different protocols **(F and G)**, and vice versa **(H and I)**. Left panels show Venn diagrams of overlapping enriched genes and right panels depict selected top enriched biological processes and signaling pathways from the overlapping gene lists. **(J and K)** Dot plots showing expression of selected genes from top ranked GO terms that are enriched in *in vivo* stage 2/3 SMPCs **(J)** or in hPSC-derived SMPCs from multiple protocols **(K)**.

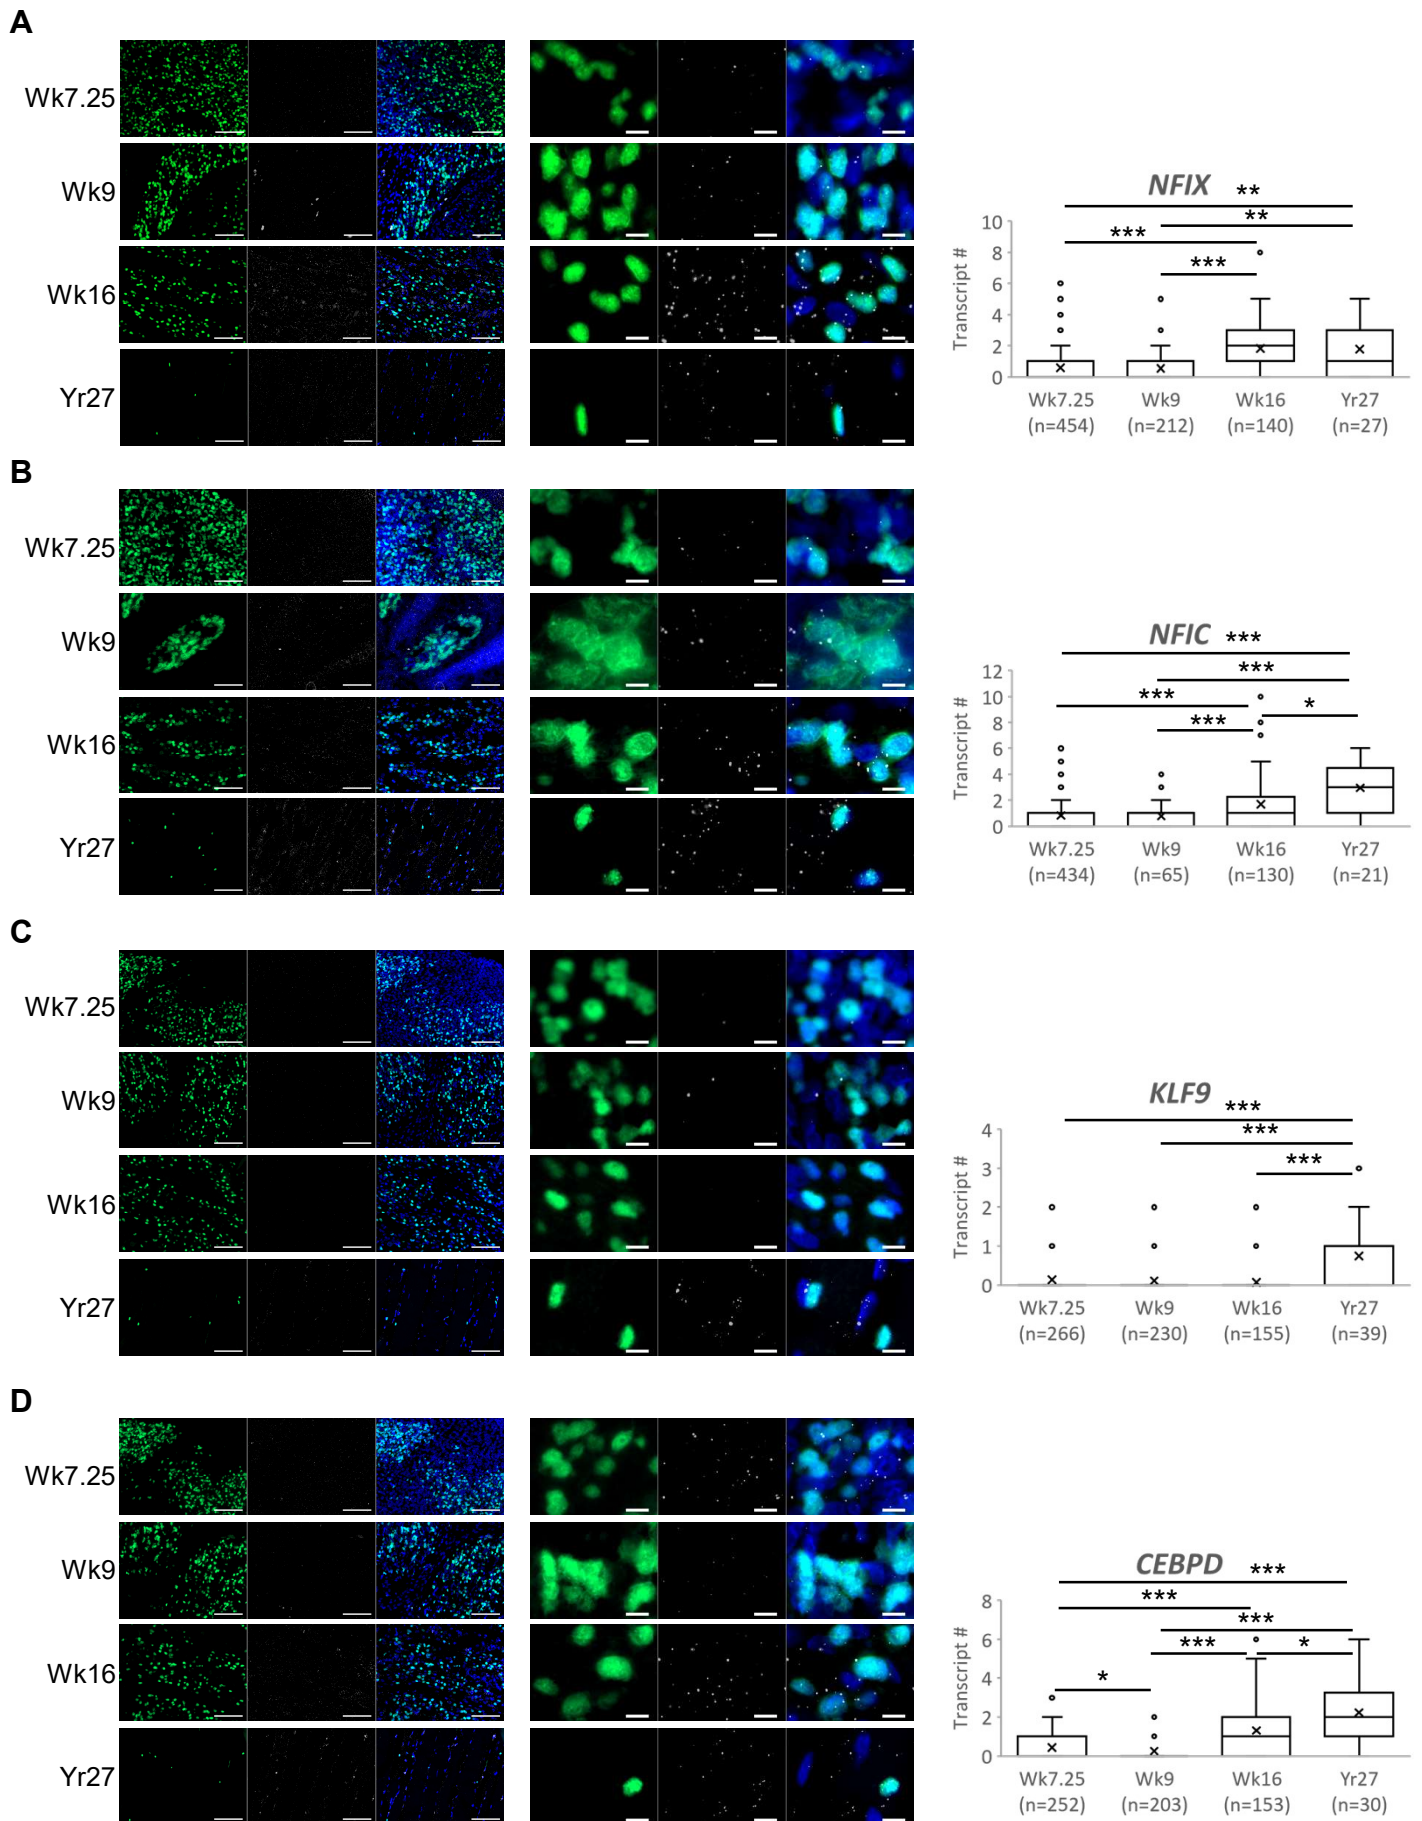

**Figure S7. Related to Figure 7. Validation of expression of TFs differentially expressed across human developmental stages.**

Tissue sections from different human developmental stages were examined by IHC for PAX7 and RNAscope for indicated TFs: *NFIX* (A), *NFIC* (B), *KLF9* (C) and *CEBPD* (D). TF transcripts (RNAscope signal positive dots; grey) were quantified within PAX7 positive cells (green). Left panels: low magnification images (scalebars: 100  $\mu\text{m}$ ). Middle panels: zoomed in areas (scalebars: 10  $\mu\text{m}$ ). Right panels: box and whisker plots showing quantification of dots per PAX7<sup>+</sup> cell from different stage samples. n denotes number of PAX7<sup>+</sup> cells quantified. Two-tailed unpaired Student's *t*-tests were performed between each sample stages followed by Bonferroni multiple test correction. \*,  $p < 0.05$ ; \*\*,  $p < 0.01$ ; \*\*\*,  $p < 0.001$ .

**Table S1. Related to Figure 1. Information of *in vivo* human samples used for scRNA-seq.**

| ID   | Age                 | Carnegie Stage | Tissue Type      | Sorting/Enrichment Strategy                                        | Cells Sequenced | Mean nGene | Mean nUMI | Mean Mapped Exon Reads |
|------|---------------------|----------------|------------------|--------------------------------------------------------------------|-----------------|------------|-----------|------------------------|
| AP32 | embryonic week 5    | CS14           | whole hindlimb   | none                                                               | 815             | 1835       | 3276      | 5215                   |
| AP37 | embryonic week 5    | CS14           | whole hindlimb   | none                                                               | 7352            | 1512       | 2728      | 7501                   |
| AP5  | embryonic week 6    | CS16           | whole hindlimb   | none                                                               | 2253            | 1511       | 2588      | 4381                   |
| AP13 | embryonic week 6    | CS16           | whole hindlimb   | none                                                               | 2609            | 1585       | 2770      | 5387                   |
| AP22 | embryonic week 6.5  | CS17           | whole hindlimb   | none                                                               | 1866            | 1575       | 2662      | 4941                   |
| AP6  | embryonic week 7    | CS18           | whole hindlimb   | none                                                               | 3779            | 1321       | 2216      | 4605                   |
| AP24 | embryonic week 7    | CS18           | whole hindlimb   | none                                                               | 856             | 1542       | 2724      | 5011                   |
| AP30 | embryonic week 7    | CS18           | whole hindlimb   | none                                                               | 4229            | 1504       | 2651      | 7988                   |
| AP29 | embryonic week 7.25 | CS19           | whole hindlimb   | none                                                               | 7532            | 1327       | 2238      | 9136                   |
| AP38 | embryonic week 7.25 | CS19           | whole hindlimb   | none                                                               | 5108            | 989        | 1659      | 5767                   |
| AP10 | embryonic week 7.75 | CS21           | whole hindlimb   | none                                                               | 1227            | 1606       | 2716      | 6254                   |
| AP14 | fetal week 9        | not applicable | whole hindlimb   | none                                                               | 4127            | 1496       | 2850      | 12251                  |
| AP36 | fetal week 9        | not applicable | whole hindlimb   | none                                                               | 5579            | 1371       | 2623      | 7181                   |
| AP23 | fetal week 12       | not applicable | hindlimb muscles | live and CD235a <sup>+</sup> /CD31 <sup>-</sup> /CD45 <sup>-</sup> | 939             | 1346       | 2401      | 4260                   |
| AP25 | fetal week 14       | not applicable | hindlimb muscles | live and CD235a <sup>+</sup> /CD31 <sup>-</sup> /CD45 <sup>-</sup> | 606             | 1276       | 2227      | 4971                   |
| AP17 | fetal week 17       | not applicable | hindlimb muscles | live and CD235a <sup>+</sup> /CD31 <sup>-</sup> /CD45 <sup>-</sup> | 3350            | 1260       | 2323      | 5660                   |
| AP16 | fetal week 18       | not applicable | hindlimb muscles | live and CD235a <sup>+</sup> /CD31 <sup>-</sup> /CD45 <sup>-</sup> | 3120            | 1326       | 2387      | 5817                   |
| AP11 | juvenile year 7     | not applicable | gastrocnemius    | live and CD235a <sup>+</sup> /CD31 <sup>-</sup> /CD45 <sup>-</sup> | 1351            | 733        | 1140      | 5680                   |
| AP34 | juvenile year 11    | not applicable | quadriceps       | live and CD235a <sup>+</sup> /CD31 <sup>-</sup> /CD45 <sup>-</sup> | 631             | 639        | 1058      | 4087                   |
| AP20 | adult year 34       | not applicable | quadriceps       | live and CD235a <sup>+</sup> /CD31 <sup>-</sup> /CD45 <sup>-</sup> | 2259            | 496        | 836       | 6295                   |
| AP28 | adult year 42       | not applicable | quadriceps       | live and CD235a <sup>+</sup> /CD31 <sup>-</sup> /CD45 <sup>-</sup> | 502             | 556        | 982       | 5223                   |

**Table S4. Related to Figure 5. Information of *in vitro* hPSC differentiation samples used for scRNA-seq.**

| ID   | Length of Differentiation | Protocol                                  | Sorting/Enrichment Strategy                                       | Cells Sequenced | Mean nGene | Mean nUMI | Mean Mapped Exon Reads |
|------|---------------------------|-------------------------------------------|-------------------------------------------------------------------|-----------------|------------|-----------|------------------------|
| HX5  | 20 days (3 weeks)         | Xi H, et al; 2017; Cell Rep               | live and PAX7-GFP <sup>+</sup>                                    | 491             | 1655       | 3039      | 11730                  |
| HX16 | 21 days (3 weeks)         | Xi H, et al; 2017; Cell Rep               | live sorted                                                       | 2533            |            |           |                        |
| HX7  | 27 days (4 weeks)         | Xi H, et al; 2017; Cell Rep               | live and PAX7-GFP <sup>+</sup>                                    | 322             | 1588       | 2868      | 9319                   |
| HX8  | 27 days (4 weeks)         | Xi H, et al; 2017; Cell Rep               | live sorted                                                       | 1240            | 1842       | 3399      | 6459                   |
| HX19 | 35 days (5 weeks)         | Xi H, et al; 2017; Cell Rep               | live and PAX7-GFP <sup>+</sup>                                    | 1387            | 1859       | 4470      | 12813                  |
| HX20 | 35 days (5 weeks)         | Xi H, et al; 2017; Cell Rep               | live and ERBB3 <sup>+</sup> /NGFR <sup>+</sup> /HNK1 <sup>-</sup> | 2031            | 1803       | 3883      | 8909                   |
| HX21 | 35 days (5 weeks)         | Xi H, et al; 2017; Cell Rep               | live sorted                                                       | 3652            | 1967       | 4508      | 13844                  |
| HX9  | 41 days (6 weeks)         | Xi H, et al; 2017; Cell Rep               | live and PAX7-GFP <sup>+</sup>                                    | 877             | 1899       | 3808      | 6209                   |
| HX10 | 41 days (6 weeks)         | Xi H, et al; 2017; Cell Rep               | live sorted                                                       | 2198            | 1591       | 3042      | 4986                   |
| HX11 | 55 days (8 weeks)         | Xi H, et al; 2017; Cell Rep               | live and PAX7-GFP <sup>+</sup>                                    | 1170            | 1667       | 3368      | 7196                   |
| HX12 | 55 days (8 weeks)         | Xi H, et al; 2017; Cell Rep               | live sorted                                                       | 2344            | 1571       | 3187      | 5768                   |
| JC1  | 34 days (5 weeks)         | Chal J, et al; 2015; Nat Biotechnol       | live and PAX7-GFP <sup>+</sup>                                    | 2526            | 1969       | 4404      | 13400                  |
| JC2  | 34 days (5 weeks)         | Chal J, et al; 2015; Nat Biotechnol       | live and ERBB3 <sup>+</sup> /NGFR <sup>+</sup> /HNK1 <sup>-</sup> | 1951            | 1854       | 4363      | 13905                  |
| JC3  | 34 days (5 weeks)         | Chal J, et al; 2015; Nat Biotechnol       | live sorted                                                       | 3531            | 1412       | 2587      | 6145                   |
| MS2  | 48 days (7 weeks)         | Shelton M, et al; 2014; Stem Cell Reports | live and PAX7-GFP <sup>+</sup>                                    | 1390            | 1616       | 4102      | 18194                  |
| MS3  | 48 days (7 weeks)         | Shelton M, et al; 2014; Stem Cell Reports | live and ERBB3 <sup>+</sup> /NGFR <sup>+</sup> /HNK1 <sup>-</sup> | 1827            | 1164       | 2328      | 8337                   |
| MS5  | 43 days (6 weeks)         | Shelton M, et al; 2014; Stem Cell Reports | live sorted                                                       | 5027            | 1212       | 2417      | 6438                   |



**Methods S1. Related to Figure 3. Primer pairs for qRT-PCR.**

| Gene Name     | NCBI Gene ID | Primer Sequences |                        |
|---------------|--------------|------------------|------------------------|
| <i>BGLAP</i>  | 632          | Forward          | CACTCCTCGCCCTATTGGC    |
|               |              | Reverse          | CCCTCCTGCTTGGACACAAAG  |
| <i>CKM</i>    | 1158         | Forward          | CTGACAAGCACAAGACTGACC  |
|               |              | Reverse          | CTGCTGAGCACGTAGTTAGGG  |
| <i>DCN</i>    | 1634         | Forward          | ATGAAGGCCACTATCATCCTCC |
|               |              | Reverse          | GTCGCGGTCATCAGGAACTT   |
| <i>eGFP</i>   | 20473140     | Forward          | GGCAAGCTGACCCTGAAGTT   |
|               |              | Reverse          | CTTCATGTGGTCGGGGTAGC   |
| <i>IBSP</i>   | 3381         | Forward          | CACTGGAGCCAATGCAGAAGA  |
|               |              | Reverse          | TGGTGGGGTTGTAGGTTCAA   |
| <i>MYH8</i>   | 4626         | Forward          | AATGCAAGTGCTATTCCAGAGG |
|               |              | Reverse          | ACAGACAGCTTGTGTTCTTGTT |
| <i>OGN</i>    | 4969         | Forward          | CTACTTGGACCATAATGCCCTG |
|               |              | Reverse          | GTCCCGGATGTAAGTGGTGTC  |
| <i>RPL13A</i> | 23521        | Forward          | GAAGTACCTGGCTTTCCTCCG  |
|               |              | Reverse          | TGGTTTTGTGGGGCAGCATA   |
